# Supplementary material for: Intra-articular administration of IκBα kinase inhibitor suppresses mouse knee osteoarthritis via downregulation of the NF-κB/HIF-2α axis
Source: PubMed Central journal article supplement (PMC6220282; doi:10.1038/s41598-018-34830-9), 2018-11-07
Supplement: 41598_2018_34830_MOESM1_ESM.pdf [file 41598_2018_34830_MOESM1_ESM.pdf]

## **Supplementary Tables and Figures**

### **Intra-articular administration of I $\kappa$ B $\alpha$ kinase inhibitor suppresses mouse knee osteoarthritis via downregulation of the NF- $\kappa$ B/HIF-2 $\alpha$ axis**

Yasutaka Murahashi<sup>1,3</sup>, Fumiko Yano<sup>2</sup>, Hiroshi Kobayashi<sup>1</sup>, Yuma Makii<sup>1</sup>,  
Kousuke Iba<sup>3</sup>, Toshihiko Yamashita<sup>3</sup>, Sakae Tanaka<sup>1</sup>, and Taku Saito<sup>1</sup>

<sup>1</sup>Sensory & Motor System Medicine, <sup>2</sup>Bone and Cartilage Regenerative Medicine,  
Graduate School of Medicine, The University of Tokyo, 7-3-1 Hongo, Bunkyo-ku,  
Tokyo 113-8655, Japan. <sup>3</sup>Department of Orthopaedic Surgery, Sapporo Medical  
Univ. School of Medicine, S-1, W-16, Chuo-ku, Sapporo, 060-8543, Hokkaido,  
Japan

|                     |     | Vehicle | 50 nM | 500 nM | 5 $\mu$ M | 50 $\mu$ M | 500 $\mu$ M |
|---------------------|-----|---------|-------|--------|-----------|------------|-------------|
| Body weight (g)     | 0 w | 24.7    | 23.5  | 24.4   | 23.6      | 25.4       | 24.6        |
|                     | 8 w | 27.8    | 28    | 27.4   | 26.7      | 27.8       | 27.8        |
| Rate of weight gain | (%) | 12.6    | 19.1  | 12.3   | 13.1      | 9.4        | 13.0        |
| <i>P</i> vs Vehicle |     |         | 0.40  | 1.00   | 0.80      | 0.82       | 1.00        |

**Supplementary Table S1** Body weights of mice after 8 weeks of BMS-345541 treatment. Data as expressed as means. *P* values were determined by the Kruskal-Wallis & Dunn's post hoc test for unequal variance.

| Grade | Osteoarthritic damage                                                                                     |
|-------|-----------------------------------------------------------------------------------------------------------|
| 0     | Normal                                                                                                    |
| 0.5   | Loss of Safranin-O without structural changes                                                             |
| 1     | Small fibrillations without loss of cartilage                                                             |
| 2     | Vertical clefts down to the layer immediately below the superficial layer and some loss of surface lamina |
| 3     | Vertical clefts/erosion to the calcified cartilage extending to <25% of the articular surface             |
| 4     | Vertical clefts/erosion to the calcified cartilage extending to 25-50% of the articular surface           |
| 5     | Vertical clefts/erosion to the calcified cartilage extending to 50-75% of the articular surface           |
| 6     | Vertical clefts/erosion to the calcified cartilage extending >75% of the articular surface                |

**Supplementary Table S2** The OARSI scoring system.

| Gene Symbol    |   | sequence              |
|----------------|---|-----------------------|
| <i>MMP13</i>   | F | TCCTACAAATCTCGCGGGAAT |
|                | R | GCATTTCTCGGAGCCTCTCA  |
| <i>ADAMTS5</i> | F | TATGACAAGTGC GGAGTATG |
|                | R | TTCAGGCTAAATAGGCAGT   |
| <i>COL2A1</i>  | F | GGTGGCTTCCATTCAGCTA   |
|                | R | TACCGGTATGTTTCGTGCAG  |
| <i>GAPDH</i>   | F | GAAGGTGAAGGTCGGAGTCA  |
|                | R | GAAGATGGTGATGGGATTTC  |

**Supplementary Table S3** Primers used for qRT-PCR.

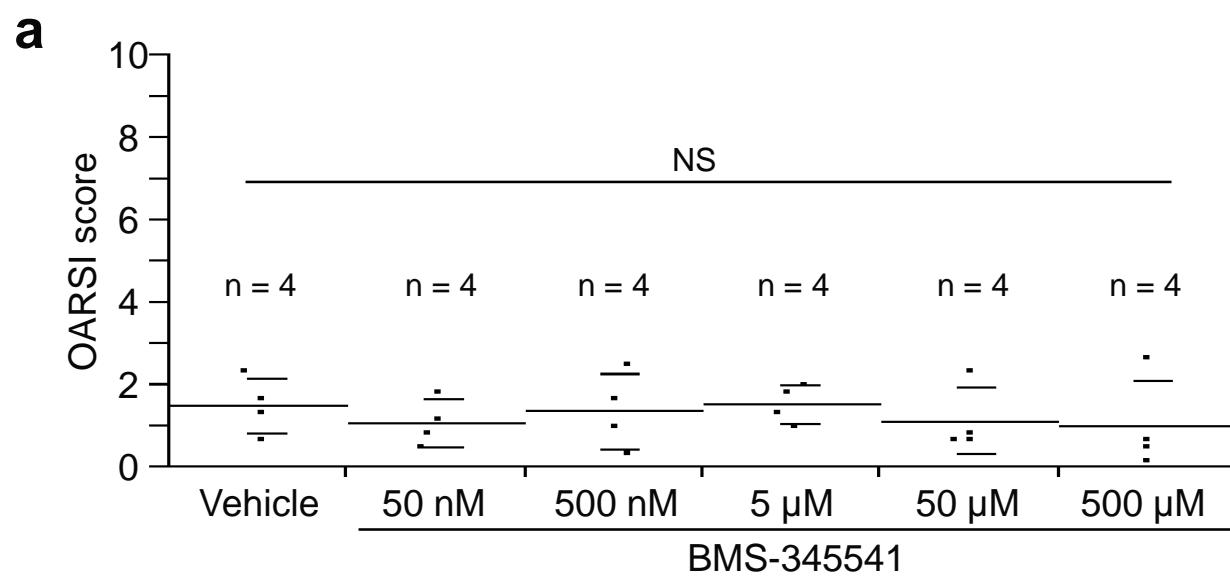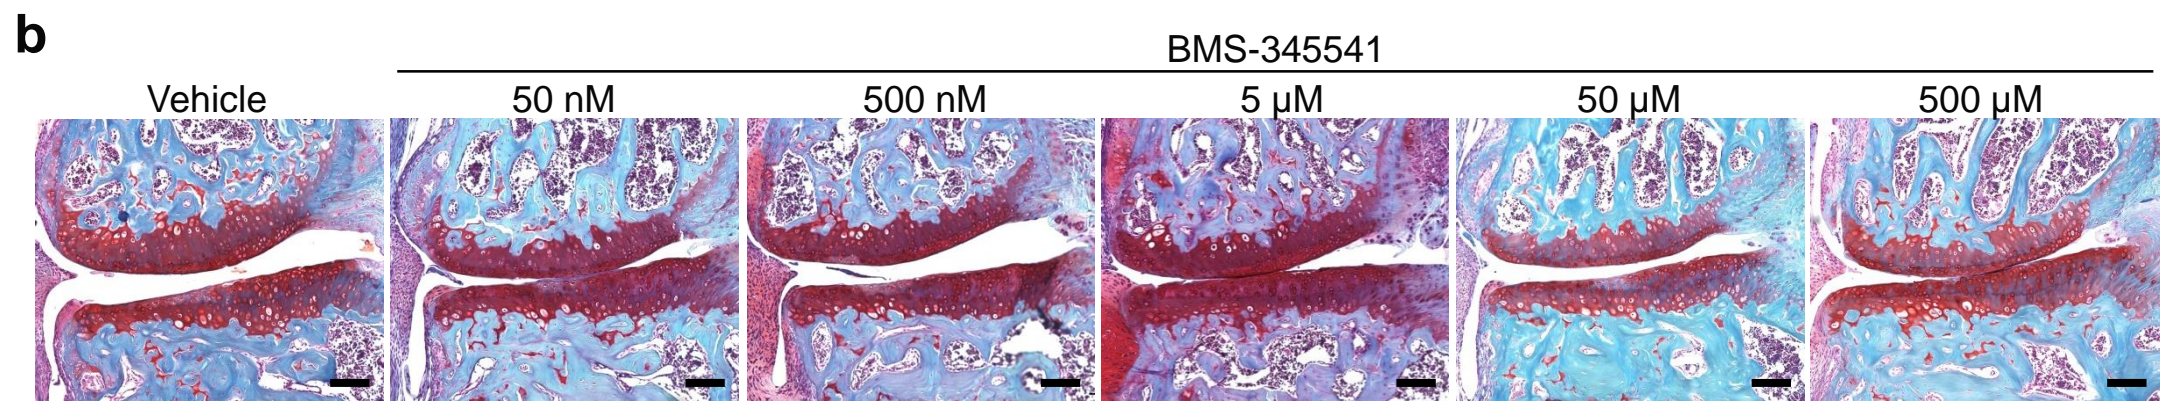

**Supplementary Figure S1 | OA development after 2-week BMS-345541 treatment.** (a) Quantification of OA development using the OARSI score. Symbols represent individual mice; long and short bars show the mean and SD, respectively. NS, not significant. (b) Representative safranin O staining from each experimental group. Scale bar, 100 μm.

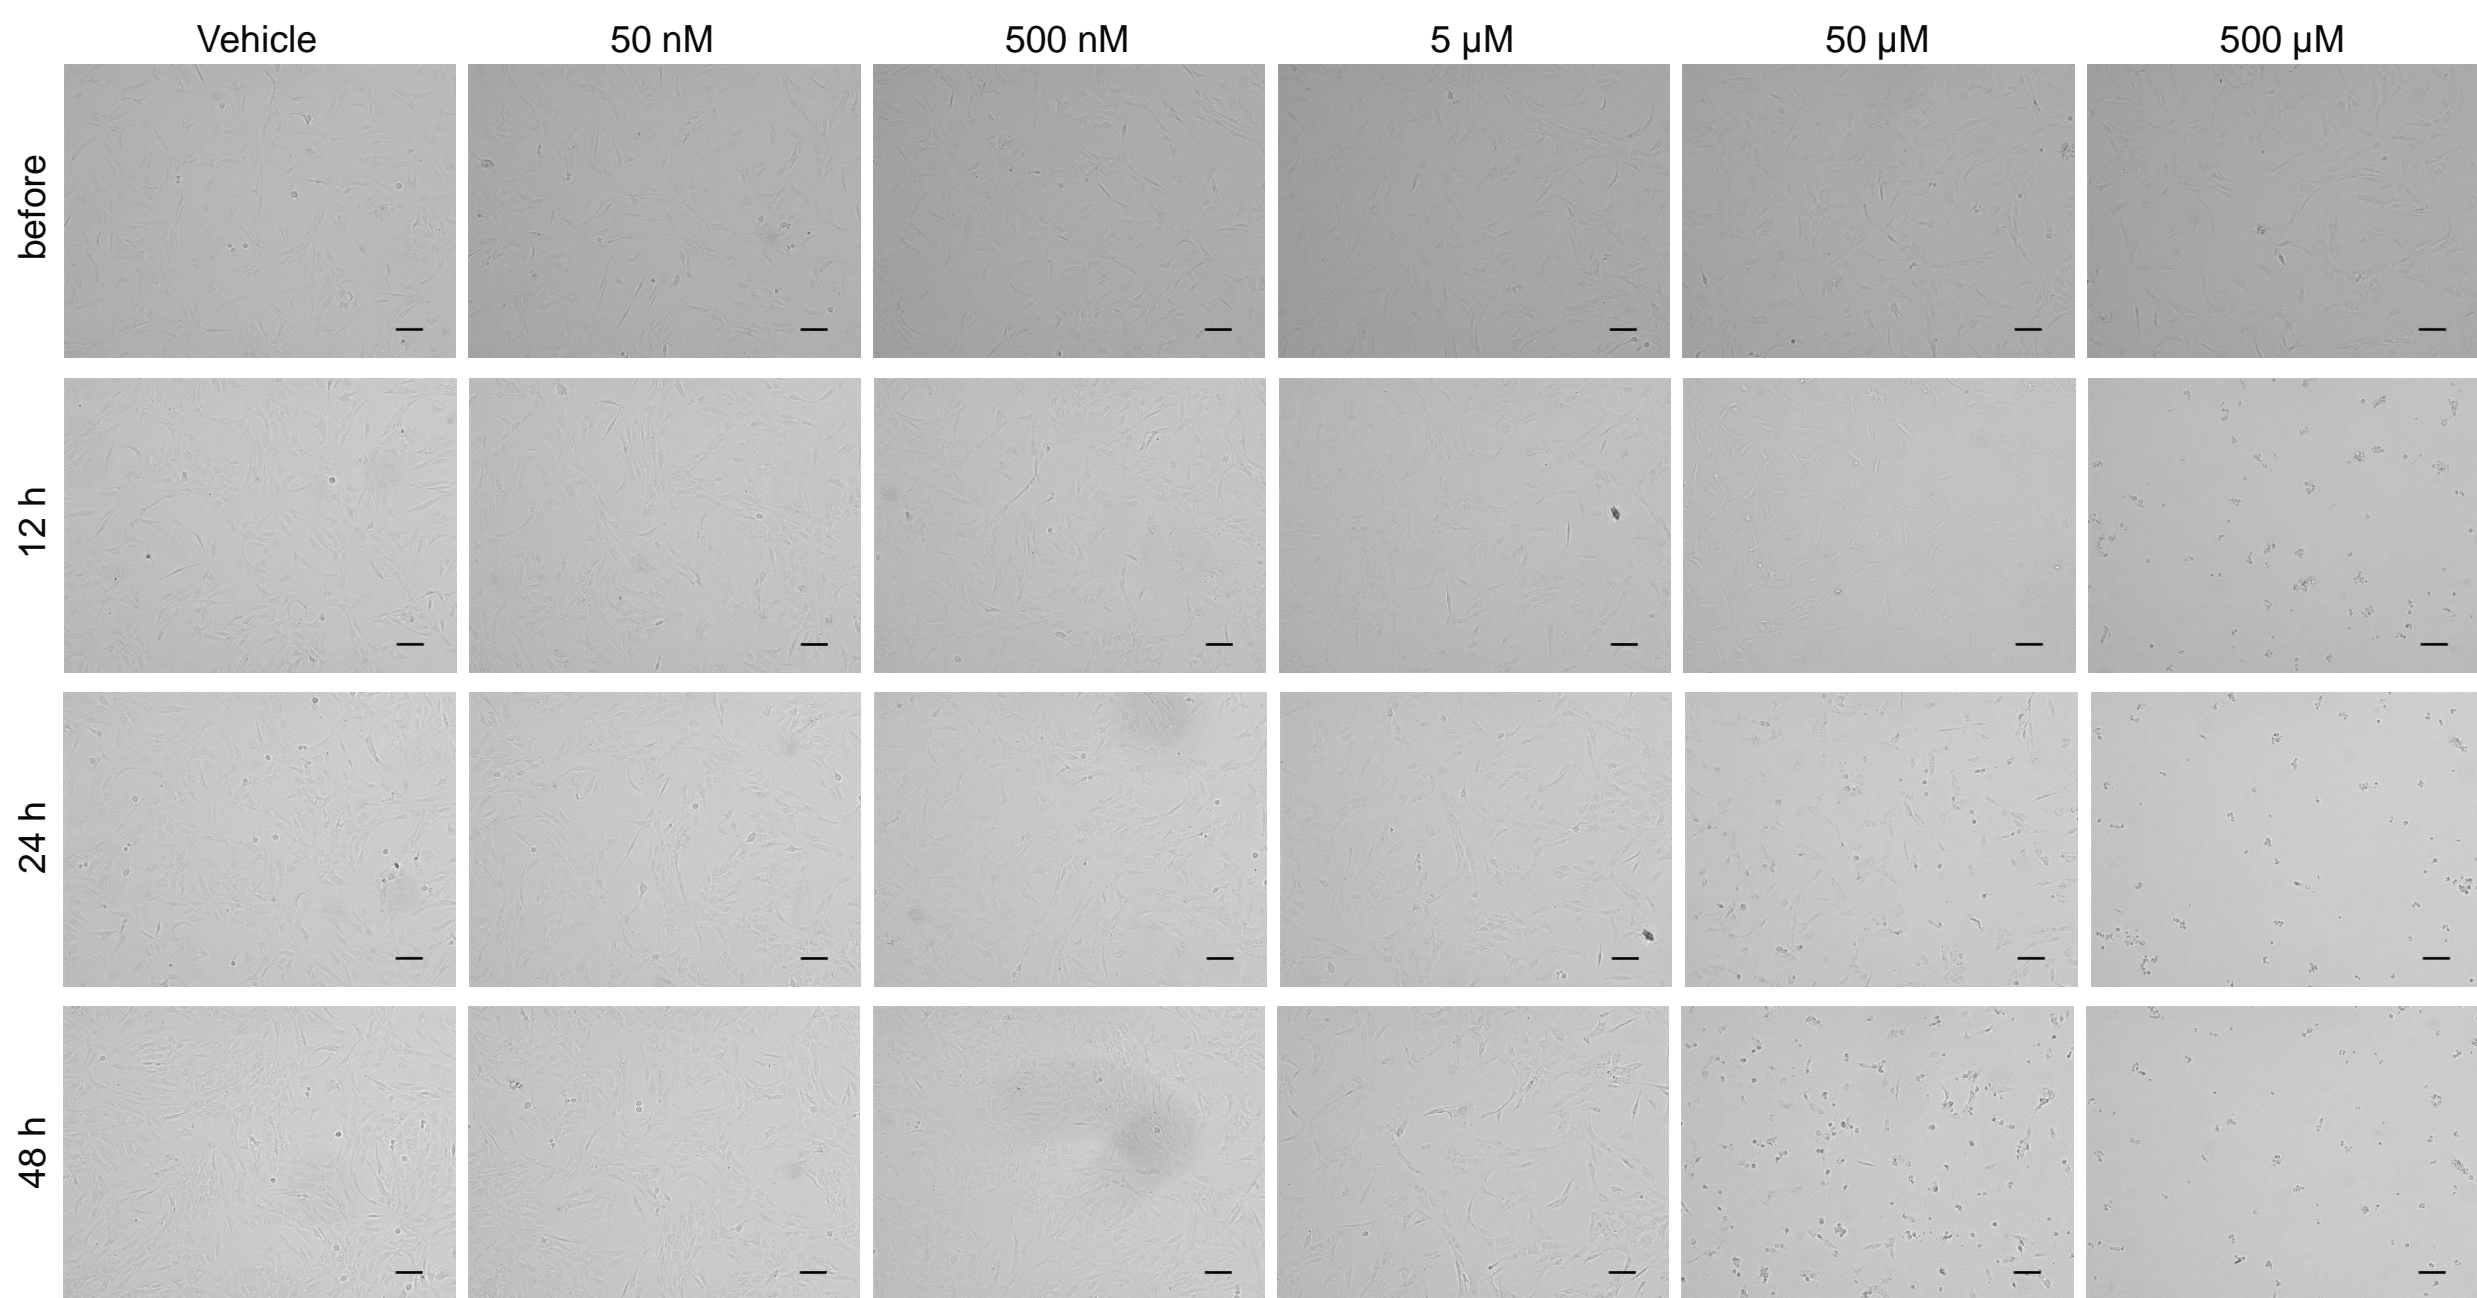

**Supplementary Figure S2 | Human articular chondrocytes treated with BMS-345541.** Phase-contrast images of human articular chondrocytes treated with vehicle or 50 nM, 500 nM, 5 μM, 50 μM, 500 μM BMS-345541 for 48 hours. Scale bars, 100 μm.

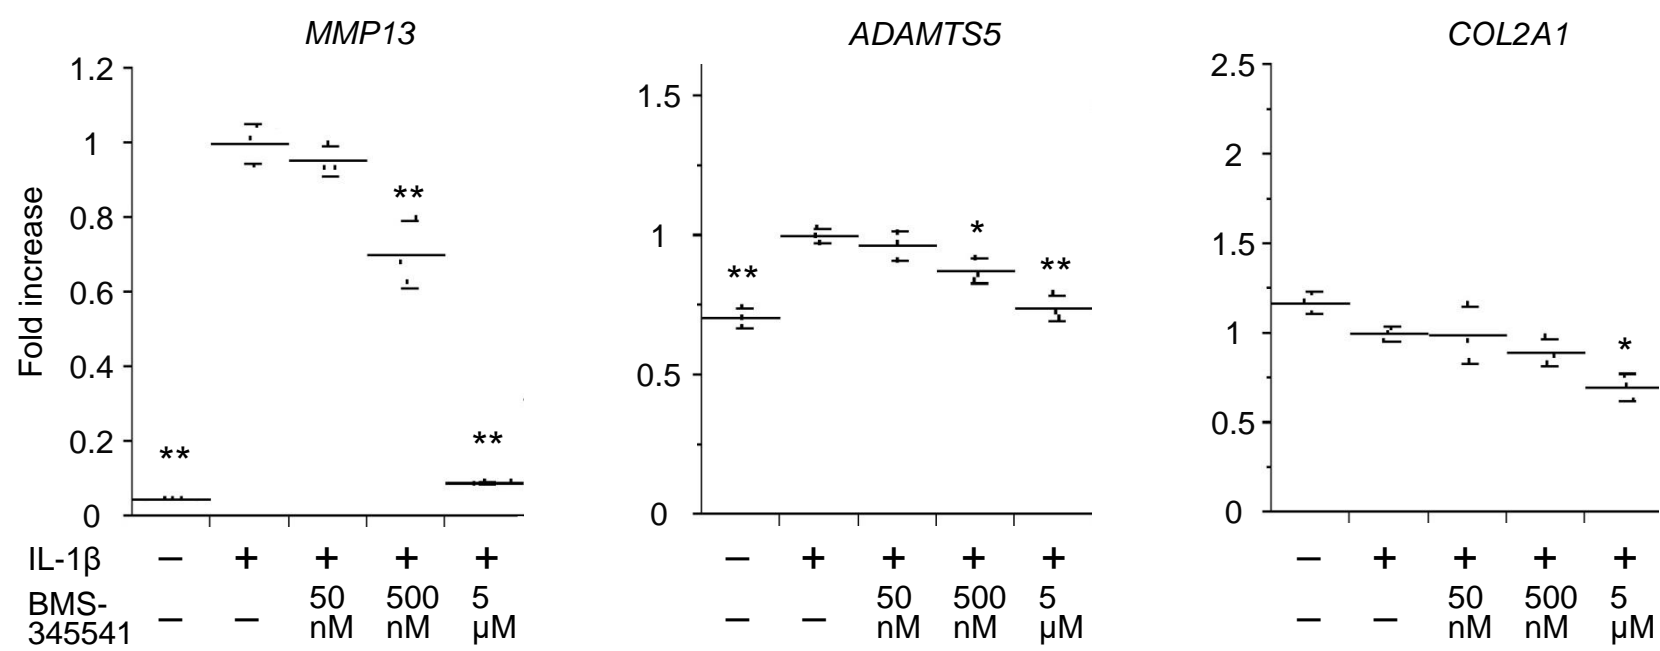

**Supplementary Figure S3 | Effects of BMS-345541 in cultured human articular chondrocytes.** mRNA levels of *MMP13*, *ADAMTS5*, and *COL2A1* in human primary articular chondrocytes treated with different concentrations of BMS-345541 with or without 10 ng/ml IL-1 $\beta$ . BMS-345541 was added 3 h after IL-1 $\beta$  stimulation, and the cells were cultured for an additional 24 h. The cells obtained from the three individuals showed similar responses, and a representative result is shown. Symbols represent individual points; long and short bars show the mean and SD of three wells per group, respectively. \* $P < 0.05$ , \*\* $P < 0.0001$  vs IL-1 $\beta$ + / BMS-345541- by the Kruskal-Wallis test and Dunn's *post hoc* test for unequal variance.

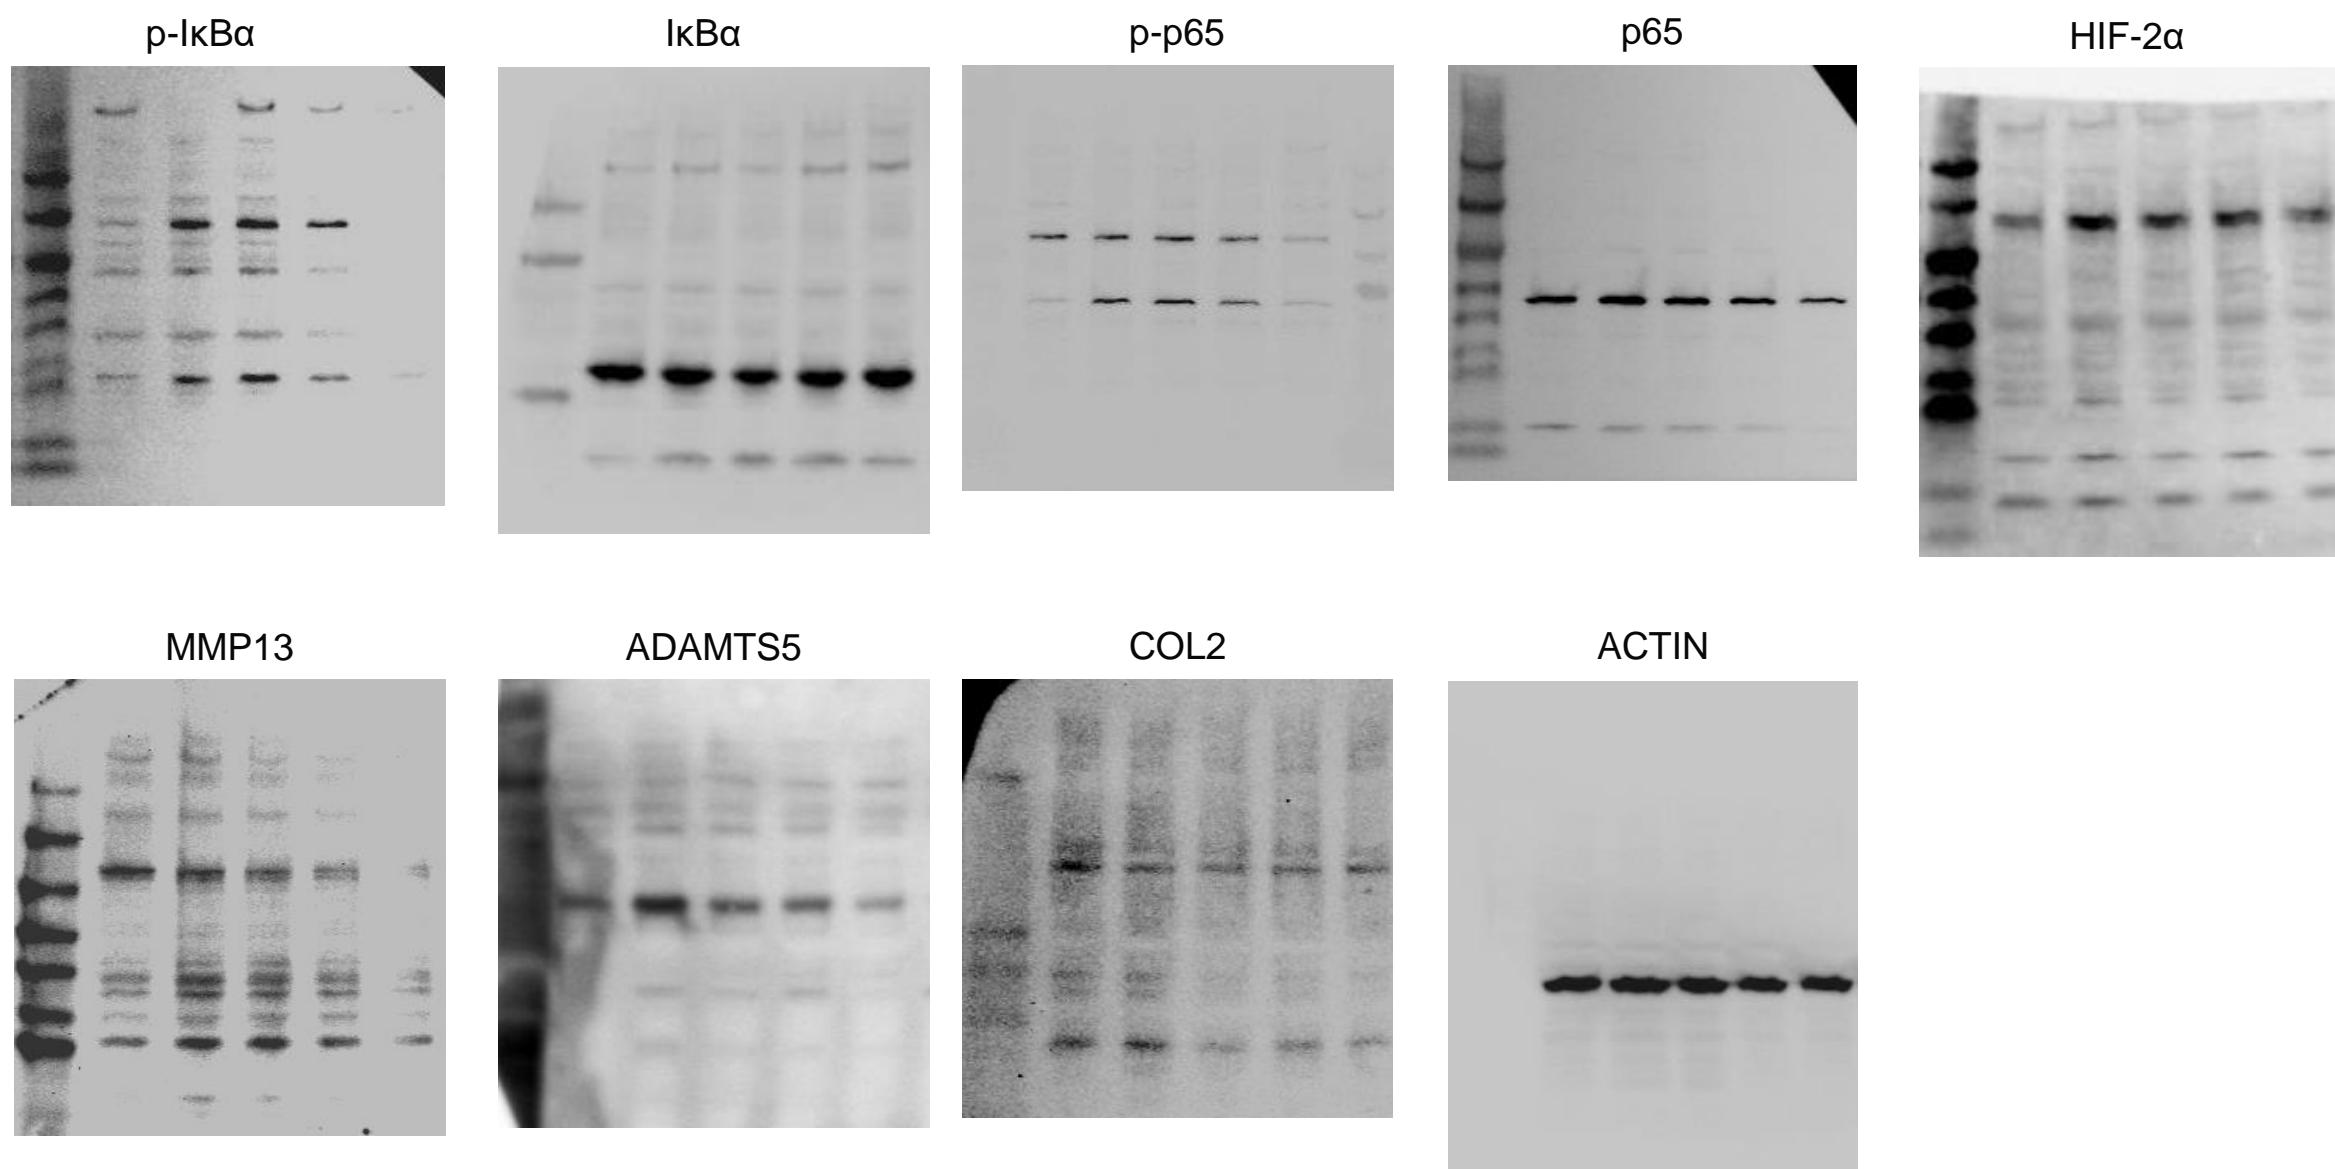

**Supplementary Figure S4 | Original images of the immunoblots shown in Fig. 5b.**
